# Supplementary material for: Intra-Population Competition during Adaptation to Increased Temperature in an RNA Bacteriophage
Source: Int J Mol Sci. 2021 Jun 24;22(13):6815. doi: 10.3390/ijms22136815 (PMC8268601; doi:10.3390/ijms22136815)
Supplement: Supplementary file 1 [file ijms-22-06815-s001.zip]

Archive with 6 entries (6 files):
- ijms-1235742-supplementary/Figure S1.pdf
- ijms-1235742-supplementary/Figure S2.pdf
- ijms-1235742-supplementary/Figure S3.pdf
- ijms-1235742-supplementary/Figure S4.pdf
- ijms-1235742-supplementary/Table S1.pdf
- ijms-1235742-supplementary/Table S2.pdf
