# Supplementary material for: Intra-Population Competition during Adaptation to Increased Temperature in an RNA Bacteriophage
Source: Int J Mol Sci. 2021 Jun 24;22(13):6815. doi: 10.3390/ijms22136815 (PMC8268601; doi:10.3390/ijms22136815)
Supplement: Supplementary file 1 [file ijms-22-06815-s001.zip › ijms-1235742-supplementary/Figure S1.pdf]

**Figure S1. Clustering analysis of the genomic sequences corresponding to virus clones isolated from L1 at transfer number 10**

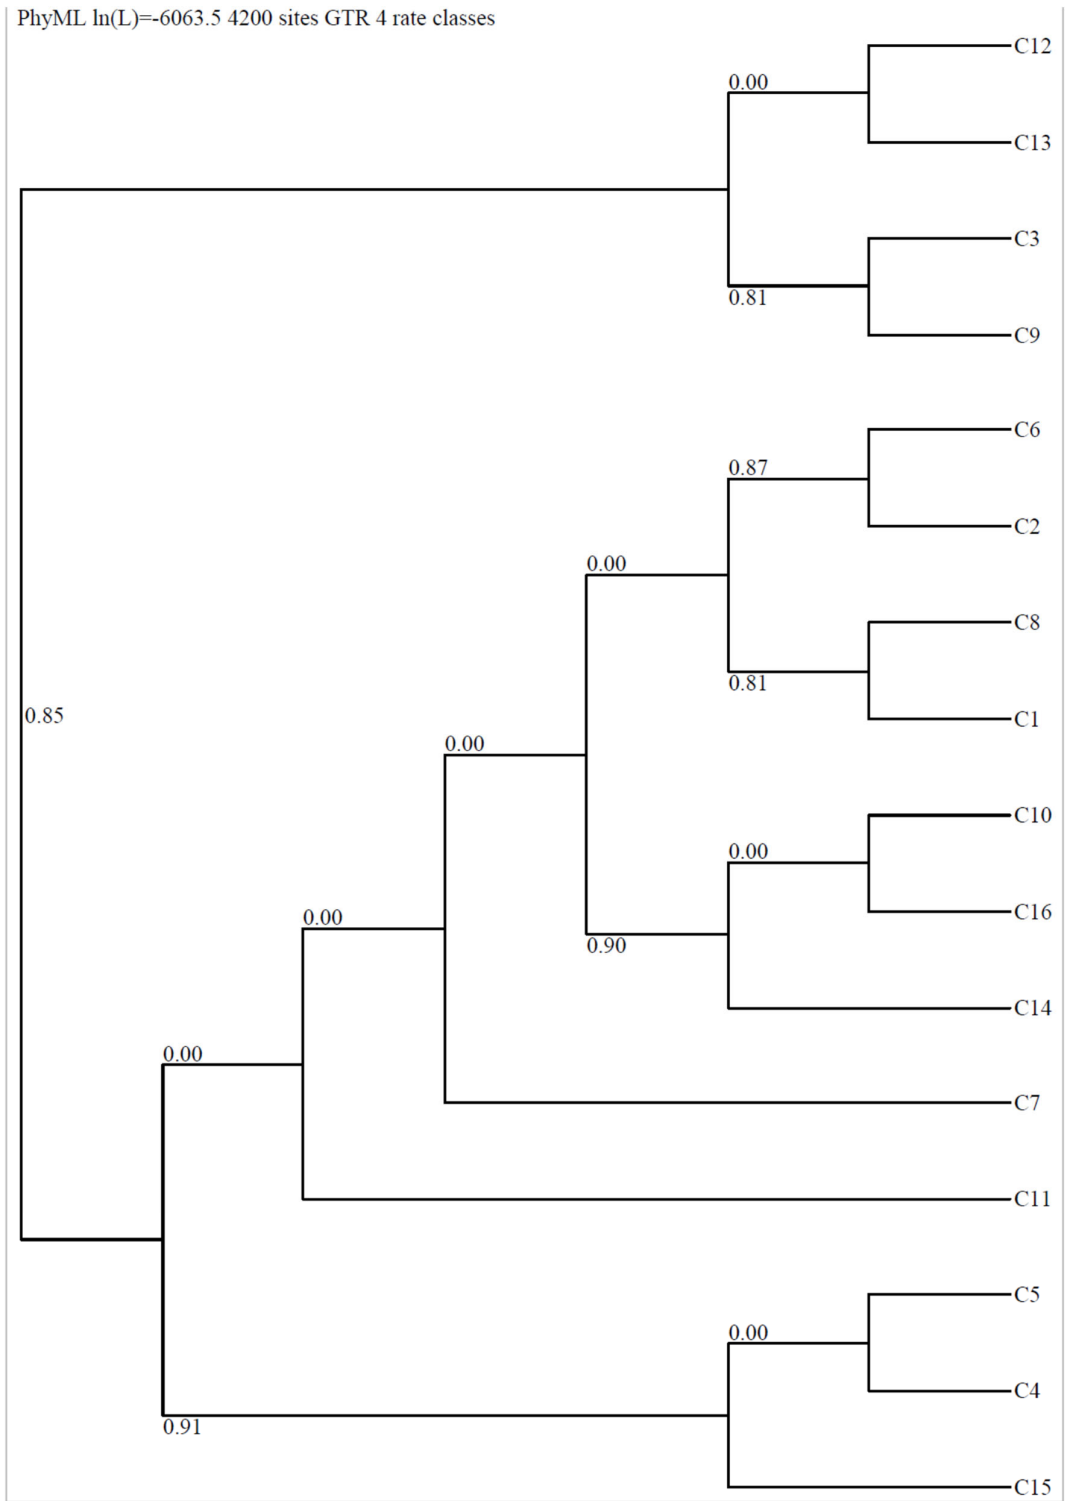

Mutations present in the sequence of each virus clone are shown in Table 1 (mutations repeated in more than one genome) and in Table S2 (mutations present in single virus clones).
