# Supplementary material for: Intra-Population Competition during Adaptation to Increased Temperature in an RNA Bacteriophage
Source: Int J Mol Sci. 2021 Jun 24;22(13):6815. doi: 10.3390/ijms22136815 (PMC8268601; doi:10.3390/ijms22136815)
Supplement: Supplementary file 1 [file ijms-22-06815-s001.zip › ijms-1235742-supplementary/Table S2.pdf]

Table S2. Additional mutations present in the virus clones shown in Tables 1-4

| Population     | Virus clone                                                        | Mutations <sup>1</sup>                                                                                                                                                             |
|----------------|--------------------------------------------------------------------|------------------------------------------------------------------------------------------------------------------------------------------------------------------------------------|
| L1 Transfer 10 | C12<br>C13<br>C3<br>C9<br>C6<br>C2<br>C16<br>C7<br>C11<br>C5<br>C4 | A3153C U3520C<br>A2092G<br>U1652C <b>U2776C</b><br>U3149C U3581C<br>U1026C C3659U<br>A1149G<br>U1463C U2847C<br><b>G2223A</b><br><b>C2228U</b> A3638G<br>G2906A<br>G3041A          |
| L1 Transfer 15 | C9<br>C5<br>C8<br>C4<br>C2<br>C6<br>C19<br>C17<br>C1               | <b>G1820A</b><br>G2636A<br>G2791A<br>C3893U<br><b>U2006C</b><br><b>A2222C</b> A4070G<br>A1079G<br>A2261G<br><b>U1025C C2201U</b>                                                   |
| L2 Transfer 15 | C1<br>C10<br>C4<br>C7<br>C6                                        | <b>U2776G</b> U3122C<br><b>A1088G</b> G1773U<br>U1155C<br>U2847C A3997G<br>U3902C                                                                                                  |
| L2 Transfer 20 | C3<br>C6<br>C11<br>C9<br>C13<br>C14<br>C15<br>C12<br>C16           | U1451C<br>U722C <b>U768C</b><br>G4101A<br>C2138U<br>G1691A C2210U U3842C<br>C2519U U2954C<br>A3824G<br><b>G1371A</b><br>C1625U <b>C1649U G1820A</b><br>U2559C C3201A <b>C3903A</b> |

<sup>1</sup>Mutations marked in red have been identified in previous studies in which Q $\beta$  adapted to high temperature [40-44].
